# Supplementary material
Source: MDPI journal article supplement (https://www.mdpi.com/1996-1073/12/9/1733)
Supplement: s1 [file s1]

# Supplement 1

The buildings were made by different materials such as light concrete blocks, face bricks, and cob. Cob is a natural building material made from subsoil, water, fibrous organic material (typically straw). The calculation of U-value for this material is extremely difficult, and no references mention this value. Therefore, the worst case for the U-value has been selected according to the following table, which is presented as Table S1.

**Table S1.** Thermophysical properties of the materials used in buildings.

| <b>Layers</b>                     | <b>Thickness (mm)</b> | <b>Density (kg/m<sup>3</sup>)</b> | <b>U-value</b>           |
|-----------------------------------|-----------------------|-----------------------------------|--------------------------|
| <b>Outside surface resistance</b> | -                     | -                                 | 0.05864                  |
| <b>Face brick</b>                 | 25                    | 2002.3                            | 0.019                    |
| <b>Gypsum plaster</b>             | 25                    | 720.8                             | 0.112                    |
| <b>LW concrete block</b>          | 78                    | 0.84                              | 0.206                    |
| <b>Pure cob</b>                   | 50                    | 60                                | Approximate value<br>0.5 |
| <b>Inside surface resistance</b>  | -                     | -                                 | 0.12064                  |
